# Supplementary material for: Summer surface air temperature proxies point to near sea-ice-free conditions in the Arctic at 127 ka
Source: Copernicus journal article supplement (doi:10.5194/egusphere-2022-594), 2022-08-10
Supplement: Supplementary file [file egusphere-2022-594-AC2-supplement.pdf]

Comment on egusphere-2022-594

Anonymous Referee #2

Referee comment on "Summer surface air temperature proxies point to near sea-ice-free conditions in the Arctic at 127 ka" by Louise Claire Sime et al., EGU sphere, <https://doi.org/10.5194/egusphere-2022-594-RC2>, 2022

**This manuscript discusses the Arctic sea ice conditions at 127 ka based on the relationship between sea ice and temperature, it is an interesting topic and well written. However, there are still some questions need to be further discussed.**

We thank #2 for their kind comments and helpful review.

**1. Due to the sea surface temperature (SST) is more related to sea ice than the surface air temperature (SAT), why the SAT is chosen instead of SST?**

Much like sea ice, there are very few SST proxy records from the Arctic from the LIG period. Kageyama et al. (2021) discusses the reasons for the lack of Arctic Sea surface records from that time. In summary though, it is largely due to difficulties with dating Arctic marine cores. For this reason, Guarino et al. (2020) and this manuscript focus on using what is available for the LIG, which are SSAT proxy records. That is why we compare these available SSAT proxy reconstructions of LIG with model simulations, effectively extending the work of Guarino et al, and investigating relationship between SIA and the surface temperatures across all the PMIP4-LIG simulations. By taking this multi-model approach, we can obtain more robust conclusions about sea ice and Arctic climate during LIG.

**2. A short summary about why these proxy records are considered to represent the summer surface air temperature should be given in order to better understand the model- data comparison.**

We thank #2 for the suggestion. Some more detail about the dataset is given in Guarino et al. (2020). We will add some extra explanation in the revised manuscript, drawn largely from the original CAPE (2006) synthesis paper:

“Terrestrial climate can be reconstructed from diagnostic assemblages of biotic proxies preserved in lacustrine, peat, alluvial, and marine archives and isotopic changes preserved in ice cores and marine and lacustrine carbonates (CAPE, 2006; Guarino et al., 2020). Quantitative reconstructions of climatic departures from the present-day are derived from range extensions of individual taxa, mutual climatic range estimations based on groups of taxa, and analogue techniques (CAPE, 2006). These proxy records are considered to represent the summer surface air temperature because summer temperature is also the most effective predictor for most biological processes, though seasonality and moisture availability may influence phenomena such as evergreen vs. deciduous biotic dominance (Kaplan et al., 2003).”

**3. In lines 210-217, if the simulations show a realistic representation of the geographical extent for the summer minimum, the CO<sub>2</sub> increases 100 (280 to 380) ppmv. The summer minimum SIA decreases 0.7 (6.4 to 5.7) mill. km<sup>2</sup>. How do you think about the sensitivity of Arctic sea ice in response to CO<sub>2</sub>?**

In this study, where we are comparing LIG and Pre-Industrial simulations, CO<sub>2</sub> concentrations are not very different (prescribed in models as 276 and 280 ppm respectively). Hence the changes are not likely from CO<sub>2</sub> forcing.

In Kageyama *et al.* (2021) Section 4.3 discuss in more depth the relationship between response to LIG climate forcings and transient CO<sub>2</sub> forced responses in models by comparing LIG results with transient 1pco2 experiments (Figure 12 in their paper). They found that the models that respond strongly to LIG forcing also respond strongly for the 1pctCO<sub>2</sub> forcing, and the model with the smallest response for the LIG has the smallest response to the 1pctCO<sub>2</sub> forcing. For #2's interest, Notz *et al.* (2016) also shows in observed sea ice (present day) has a very linear relationship with CO<sub>2</sub>.

We will add these points to the revised manuscript in the discussions section.

**4. In part 3.1, different models show significant difference in the simulated Arctic sea ice for both the PI and LIG simulations. What do you think leads these difference between different models? How about the sensitivity of Arctic sea ice in response to astronomical forcing and how about the polar amplification in different models due to both of them have a great effect on the Arctic sea ice?**

Sea ice formation and melting can be affected by a large number of factors inherent to the atmosphere and the ocean dynamics, alongside the representation of sea ice itself within the model (*i.e.* the type of sea ice scheme used). In coupled models it can therefore be difficult to identify the causes of this coupled model behavior (Kagayama *et al.* 2021, Sicard *et al.* 2022). Nevertheless Kagayama *et al.* (2021; Section 4), alongside Diamond *et al.* (2021) do address the question of what drives model differences in summertime LIG sea ice. In summary:

1. All models show a major loss of summertime Arctic sea ice between the PI and LIG.
2. Across all models, there is an increased downward short-wave flux in spring due to the imposed insolation forcing and a decreased upward short-wave flux in summer, related to the decrease of the albedo due to the smaller sea ice cover. Differences between the model results are due to a difference in phasing of the downward and upward shortwave radiation anomalies.
3. The sea ice albedo feedback is most effective in HadGEM3. It is also the only model in which the anomalies in downward and upward shortwave radiation are exactly in phase.
4. The CESM2 and HadGEM3 models (which both simulate significant sea ice loss) exhibit an Atlantic Meridional Overturning Circulation (AMOC) that is almost unchanged between PI and LIG, while in the IPSLCM6 model (with moderate sea ice loss) the AMOC weakens. This implies that a reduced northward oceanic heat transport could reduce sea ice loss in the Central Arctic in some models.
5. The two models (HadGEM3 and CESM2) which had the lowest sea ice loss contain explicit melt pond schemes, which impact the albedo feedback in these models. Diamond *et al.* (2021) show that that the summer ice melt in HadGEM3 is predominantly driven by thermodynamic processes and those thermodynamic processes are significantly impacted by melt ponds.

On polar amplification, Fig R2 (below) shows the relationship between Arctic Amplification index and SIA changes. It is evident from the figure that the models have diverse response in Arctic amplification and a linear relationship between Arctic amplification index and sea ice change amongst models is not very evident.

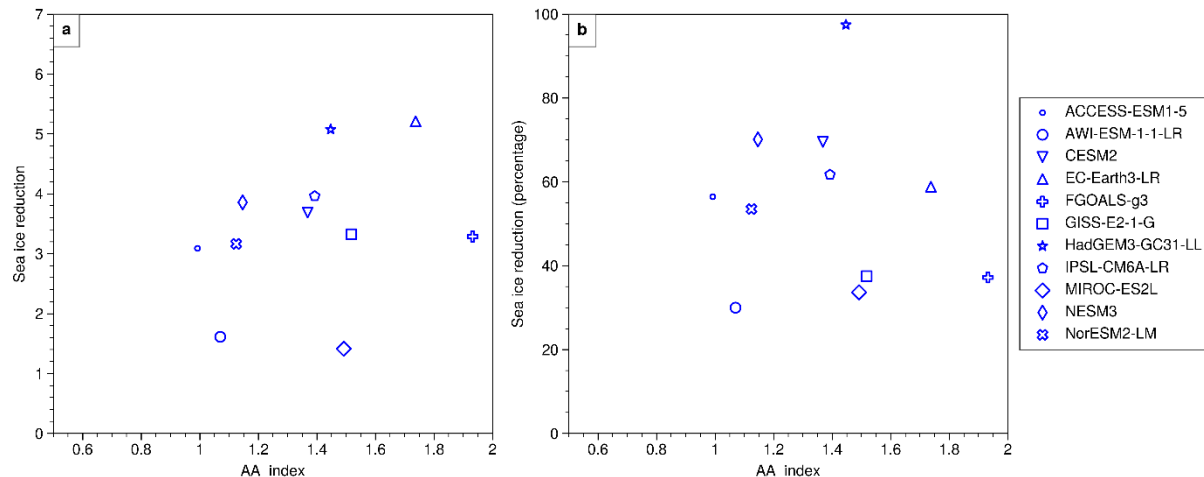

**Figure R2:** Arctic Amplification (AA) index plotted against  $\Delta SIA$  (a) and percentage reduction of LIG sea ice relative to PI (b). AA index is defined as the ratio of the  $\Delta SSAT$  averaged over Arctic (north of  $60^\circ N$ ) to that averaged over whole Northern hemisphere.

We will add these points as a separate section as Intermodel differences in the supplementary material.

**5. Although your results show that near sea-ice-free conditions in the Arctic at 127 ka, some records indicate that there still exists substantial sea ice (for example, in lines 233-234 and in Stein et al. (2017) <https://doi.org/10.1038/s41467-017-00552-1>). More discussion about these records should be given.**

Indeed #2 is correct that some marine core records suggest that there were perennial sea ice above Arctic core sites. The most up-to-date synthesis and discussion on marine core records is given in Kagayama et al. (2021). We show this same synthesis in our Figures 3.

Quoting from Kagayama et al. (2021): “Based on IP25/PIP25 records obtained from central Arctic Ocean sediment cores (see Fig. 1 for core locations and Table 1 for data), perennial sea ice cover probably existed during the LIG in the Central Arctic, whereas along the Barents Sea continental margin, influenced by the inflow of warm Atlantic Water, sea ice was significantly reduced (Stein et al., 2017). However, Stein et al. (2017) emphasizes that the PIP25 records obtained from the central Arctic Ocean cores indicating a perennial sea ice cover have to be interpreted cautiously as the biomarker concentrations are very low to absent (see Belt, 2018 for further discussion). The productivity of algal material (ice and open water) must have been quite low, so that (almost) nothing reached the seafloor or is preserved in the sediments, and there must have been periods during the LIG when some open-water conditions occurred, since subpolar foraminifers and coccoliths were found in core PS51/038 and PS2200 (Stein et al., 2017). It is however unclear whether these periods equate to more than 1 month yr<sup>-1</sup> of open water (or seasonal ice conditions). This explains why some sites show both seasonal and perennial interpretations at the same site.”

We do not suggest repeating all in the current manuscript. However, we suggest in response to #2 that we add a sentence after L 236 “models generally tend to match the results from proxies of summertime Arctic sea ice in marine cores with good LIG chronology (Figure 3), apart from the anomalous northernmost core for which the IP25 evidence suggest perennial sea ice (Kageyama et al., 2021). Stein

et al. (2017) suggest that PIP25 records obtained from the central Arctic Ocean cores indicating a perennial sea ice cover have to be interpreted cautiously, given that biomarker concentrations are very low to absent, so it is difficult to know how much weight to place on this particular result. Additionally, given Hillaire-Marcel et al. (2017) question the age model of the data from the central Arctic Ocean, thus these IP25 data need to be interpreted with some caution.”

**6. In lines 389-391, you state that “ the 8 models with largest SIA reduction are all able to match, within uncertainty, the mean PI to LIG summertime Arctic warming of  $4.5 \pm 1.7$  K at the 21 proxy locations”. But in lines 397-399, “The two most skillful models simulate an average LIG sea ice area of 1.3 mill. km<sup>2</sup> which is a 4.5 mill. km<sup>2</sup> or 79% reduction from their PI values”, only the average result of the two models is given, why not the average result of these eight models?**

Thanks for pointing out the possible confusion which may arise while reading. To clarify further, the first sentence (lines 389-391) be rewritten as

“In particular, 8 out of 11 models are able to match, within uncertainty, the average PI to LIG summertime Arctic warming of  $4.5 \pm 1.7$  K as recorded by surface temperature proxies. Among the models, two of them capture the magnitude of the observed dSSAT in more than 60% of the total proxy locations. These models simulate an average LIG sea ice area of 1.3 mill. km<sup>2</sup> which is a 4.5 mill. km<sup>2</sup> or 79% reduction from their PI values.”

**7. It is not clear that how many model results are used to establish the relationship between  $\Delta$ SSAT and  $\Delta$ SIA, 2 or 8 or 11? If it is 2 or 11, why not 8?**

We used all the 11 models used in this study to derive the relationship between SSAT and SIA. (The discussion with 8 models will be corrected in response to the previous question, which will clarify the confusion raised in this question)

**8. The forcing mechanism for the near sea-ice-free conditions in the Arctic at 127 ka should be discussed**

Guarino et al (2020), Kageyama et al (2021), and Diamond et al (2021) discusses in detail about mechanisms for reduced sea ice in LIG simulations. Please see also our response to question 4.

**Additional references:**

Sicard, M., A.M. de Boer, and L.C. Sime 2022, Last Interglacial Arctic sea ice as simulated by the latest generation of climate models, *Past Global Changes Magazine*, 30(2): 92-93

D. Notz, J. Stroeve, Observed Arctic sea-ice loss directly follows anthropogenic CO<sub>2</sub> emission. *Science* 354, 747–750 (2016).

Belt, S.: Source-specific biomarkers as proxies for Arctic and Antarctic sea ice, *Org. Geochem.*, 125, 277–298, <https://doi.org/10.1016/j.orggeochem.2018.10.002>, 2018.
